# Supplementary material for: Occurrence of Honey Bee (Apis mellifera L.) Pathogens in Wild Pollinators in Northern Italy
Source: PubMed Central journal article supplement (PMC9280159; doi:10.3389/fcimb.2022.907489), 2022-06-30

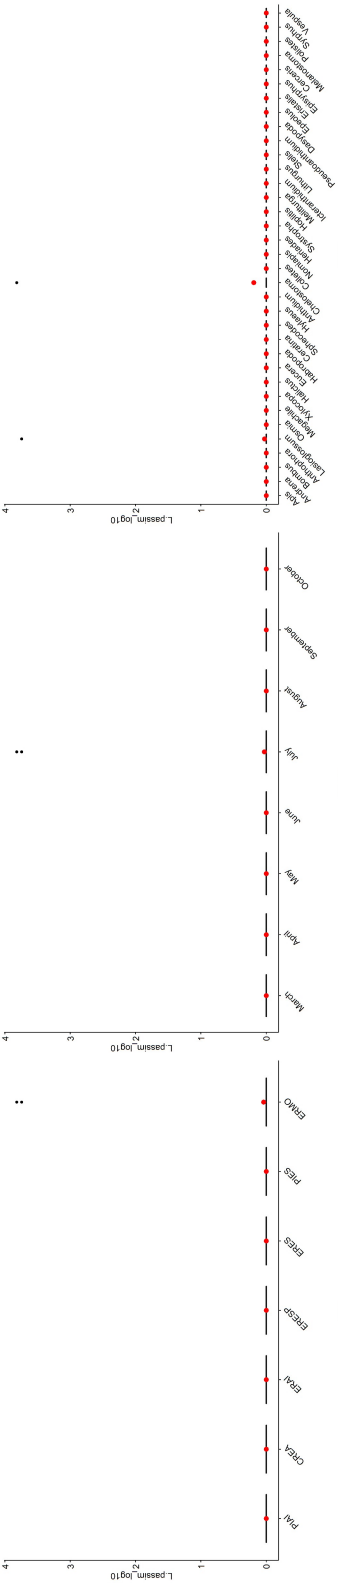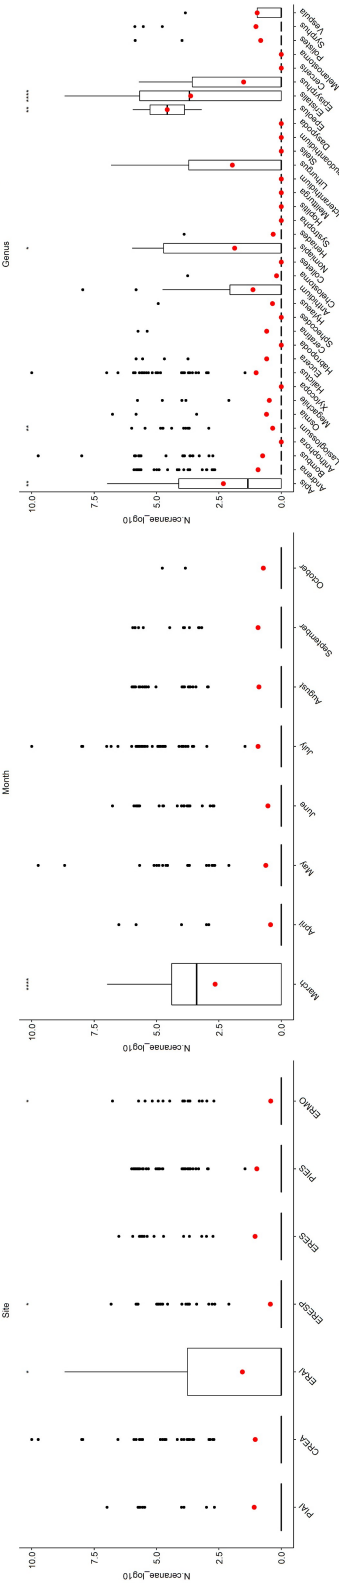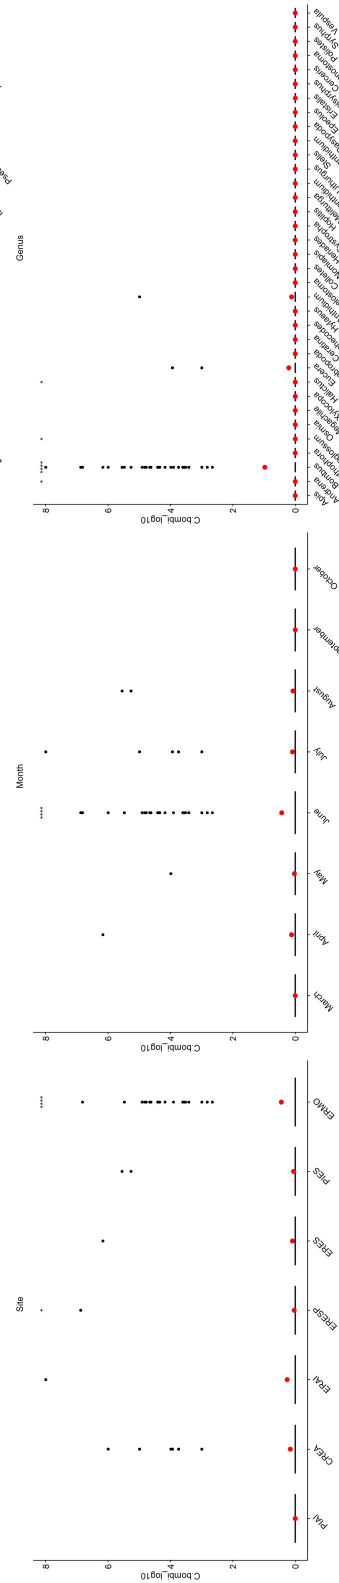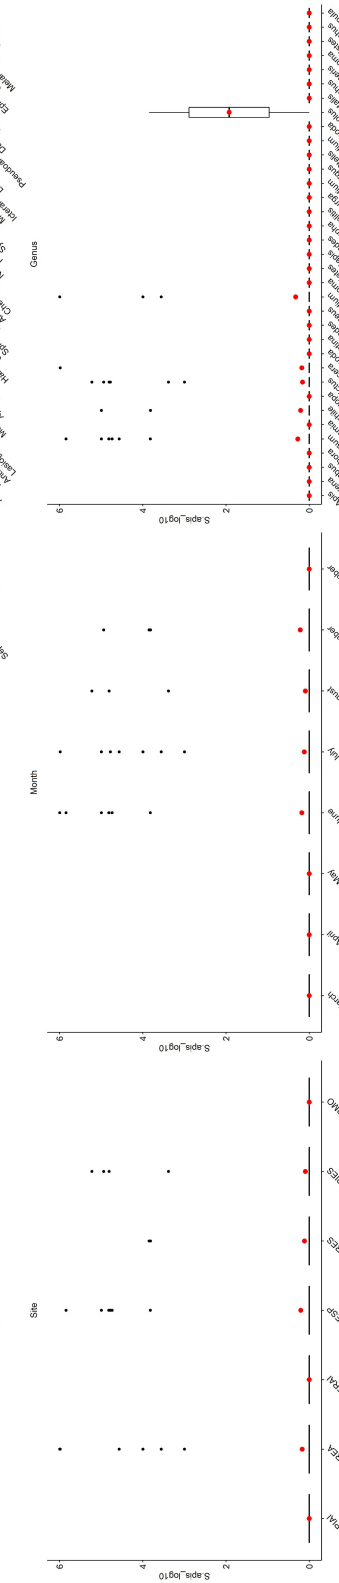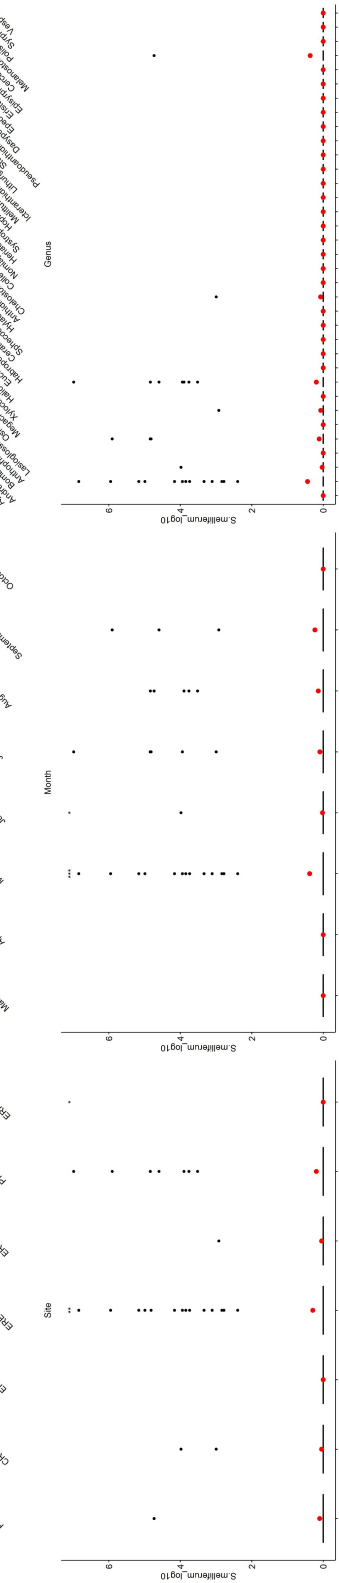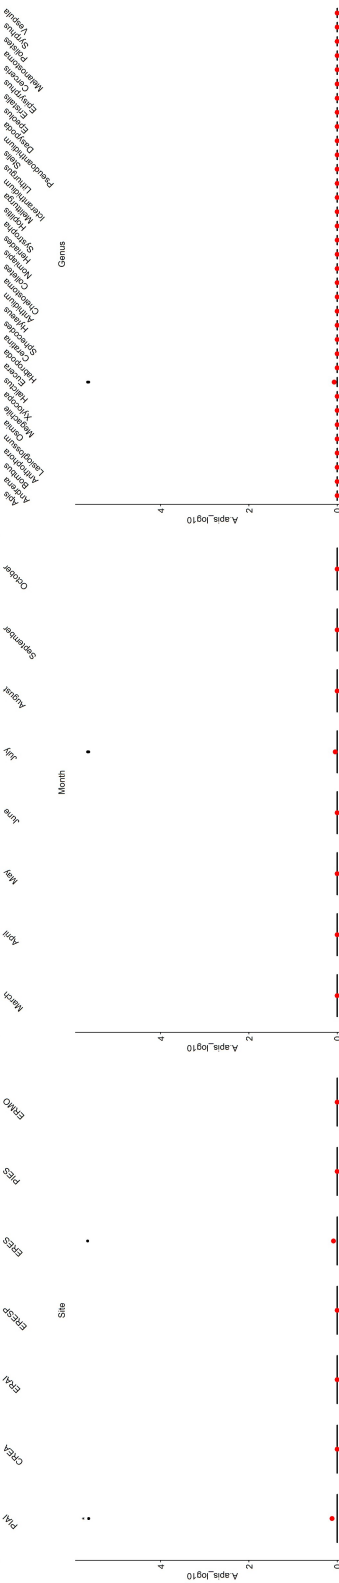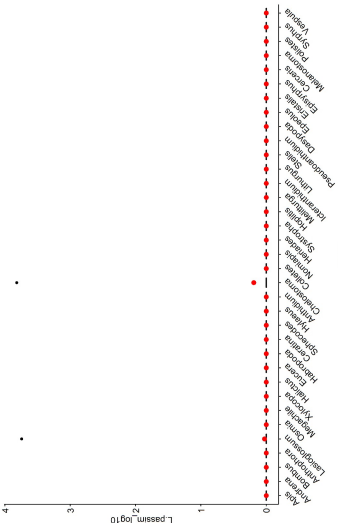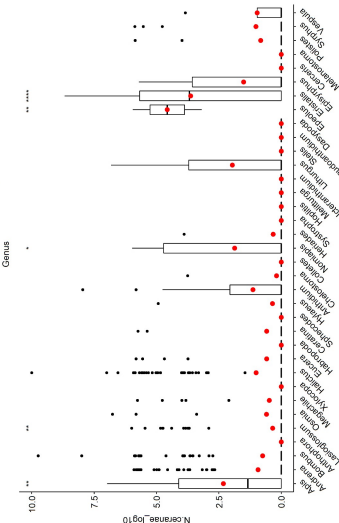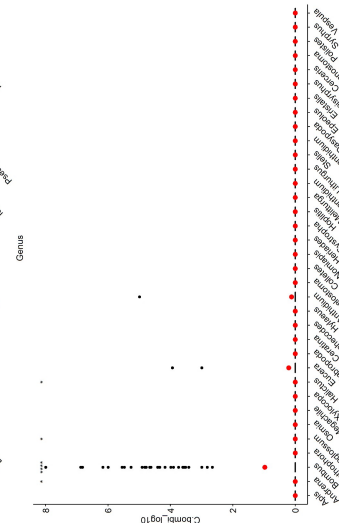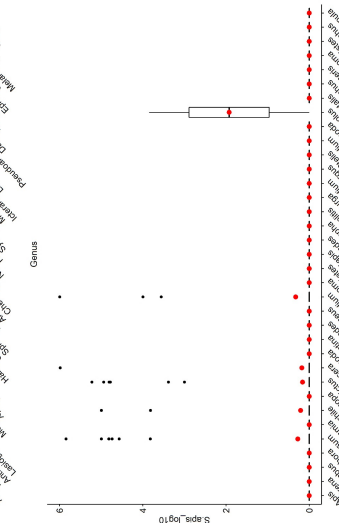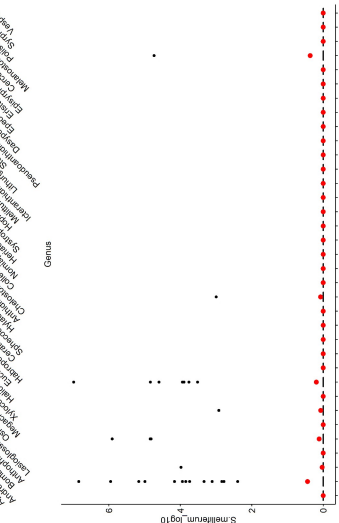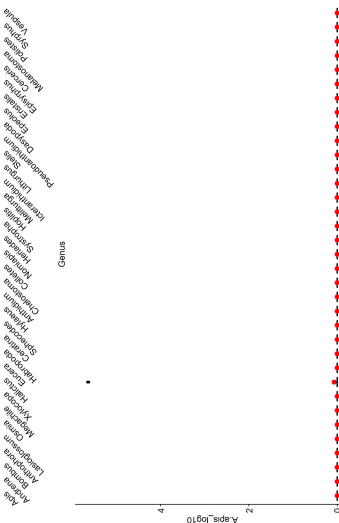

Supplement: DataSheet_2.pdf [file DataSheet_2.pdf]
